# Supplementary material
Source: publisher figshare collection journal article supplement (https://gsajournals.figshare.com/ndownloader/files/13878992)
Supplement: Supplementary file 1 [file 13878992]

Table S8 Predicted genes involved in the DNA replication of *M. dispar*

| Locus | Product | Gene | Protein length (aa) | Position |
| --- | --- | --- | --- | --- |
| M.dispar-GS01_GM000001 | chromosomal replication initiation protein | *dnaA* | 469 | 1…1410 |
| M.dispar-GS01_GM000002 | DNA polymerase III subunit beta | *dnaN* | 378 | 1550…2686 |
| M.dispar-GS01_GM000021 | topoisomerase IV subunit A | *parC* | 851 | 23060…25615 |
| M.dispar-GS01_GM000022 | topoisomerase IV subunit B | *parE* | 642 | 25608…27536 |
| M.dispar-GS01_GM000057 | DNA primase | *dnaG* | 603 | 58457…60268 |
| M.dispar-GS01_GM000139 | DNA gyrase subunit A | *gyrA* | 865 | 179537…182134 |
| M.dispar-GS01_GM000345 | single-strand DNA-binding protein | *ssb* | 179 | 432920…433459 |
| M.dispar-GS01_GM000391 | replication initiation and membrane attachment protein | *dnaB* | 322 | 485493…486461 |
| M.dispar-GS01_GM000580 | DNA polymerase III subunit alpha | *dnaE* | 989 | 758017…760986 |
| M.dispar-GS01_GM000581 | DNA polymerase I | *polA* | 295 | 760979…761866 |
| M.dispar-GS01_GM000633 | ribonuclease HIII | *rnhC* | 246 | 823517…824257 |
| M.dispar-GS01_GM000648 | DNA polymerase III subunit delta | *holA* | 309 | 842746…843675 |
| M.dispar-GS01_GM000670 | DNA gyrase subunit B | *gyrB* | 648 | 874984…876930 |
| M.dispar-GS01_GM000700 | DNA polymerase III subunit alpha | *polC* | 1471 | 913249…917664 |
| M.dispar-GS01_GM000710 | DNA ligase | *ligA* | 687 | 929193…931256 |
| M.dispar-GS01_GM000716 | DNA polymerase III subunit delta' | *holB* | 291 | 935220…936095 |
| M.dispar-GS01_GM000720 | DNA polymerase III gamma and tau subunit | *dnaX* | 713 | 937662…939803 |
| M.dispar-GS01_GM000782 | replicative DNA helicase | *dnaB* | 463 | 1008839…1010230 |
| M.dispar-GS01_GM000824 | ribonuclease P protein component | *rnpA* | 112 | 1065107…1065445 |
